# Supplementary material for: Cytokine-Modulated Natural Killer Cells Differentially Regulate the Activity of the Hepatitis C Virus
Source: MDPI journal article supplement (doi:10.3390/ijms19092771), 2018-09-14
Supplement: s1 [file s1]

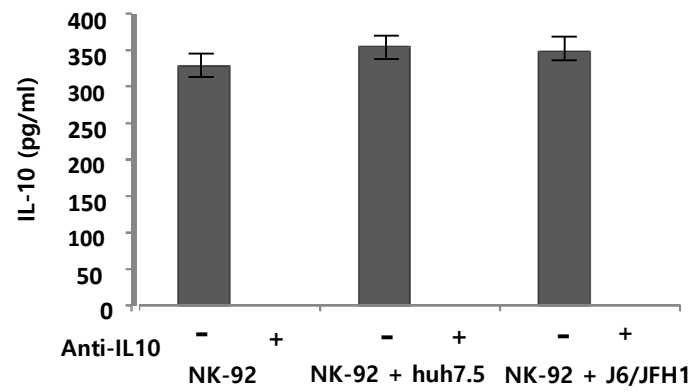

Supplementary Figure 1. Neutralization of IL-10 by anti-IL-10 treatment. NK-92 cells alone or coculture with huh7.5 cells (or J6/JFH1) were incubated in the presence or absence of anti-IL-10 (0.1 ng/ml) for 6 h and supernatants from each culture was harvested and the amount of IL-10 was measured using ELISA.
